# Supplementary material for: Galleria mellonella Antimicrobial Peptides and Stress Management Gene Expression in Response to Deleterious Events Caused by Sporothrix brasiliensis
Source: Preprints.org preprint supplement (doi:10.20944/preprints202309.0109.v1), 2023-09-04
Supplement: Supplementary file 3 [file supplementary]

*Supplementary material*

*Galleria mellonella* antimicrobial peptides and stress manage-ment gene expression in response to deleterious events caused by *Sporothrix brasiliensis*

Nathália Faria Reis1, Myrela Conceição Santos de Jesus1, Lais Cavalcanti dos Santos Velasco de Souza1, Lucas Martins Alcântara1, Julia Andrade de Castro Rodrigues1, Simone Cristina Pereira Brito1, Patrícia de Azambuja Penna2, Cecília Stahl Vieira2, José Rodrigo Santos Silva3, Bruno de Araújo Penna4, Ricardo Luiz Dantas Machado1, Hector M. Mora-Montes5, Andréa Regina de Souza Baptista1,6*

|  |
| --- |

1 Center for Microorganisms' Investigation, Department of Microbiology and Parasitology, Biomedical Institute, Federal Fluminense University, Niterói, Rio de Janeiro, Brazil

2 Laboratory of Insect Biology, Federal Fluminense University, Niterói, RJ, Brazil

3 Department of Statistics and Actuarial Sciences, Federal University of Sergipe, Brazil

4 Laboratory of Gram-Positive Cocos, Biomedical Institute, Fluminense Federal, University, Niterói, Rio de Janeiro, Brazil

5 Department of Biology, Division of Natural and Exact Sciences, Campus Guanajuato, University of Guanajuato, Guanajuato, Mexico

6 Rede Micologia RJ - Fundação de Amparo à Pesquisa do Estado do Rio de Janeiro (FAPERJ), Rio de Janeiro, Brasil.

***** Correspondence: andrearegina@id.uff.br.


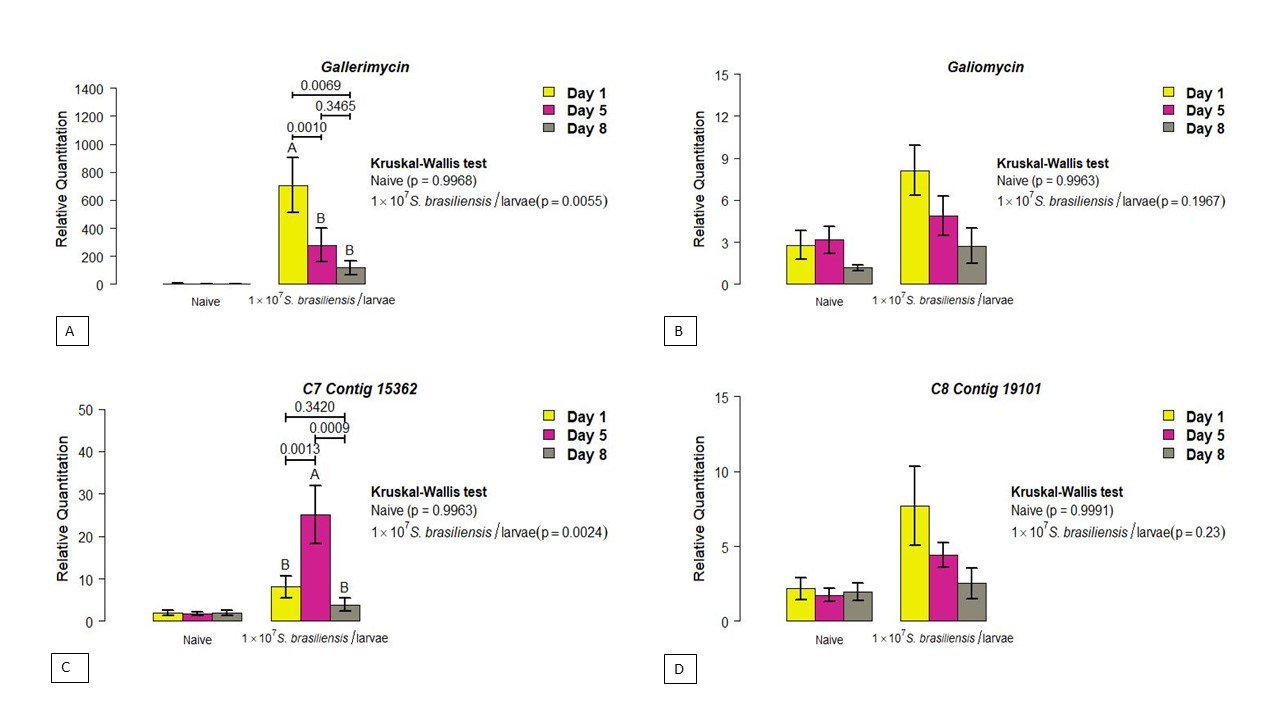


**Figure S1**: Investigation of the gene expression profile of the invertebrate host *Galleria mellonella* in infection by the pathogenic fungus *Sporothix brasiliensis*. Dynamics of gene expression observed according to day, for each experimental group. **(A)** Gallerimycin, **(B)** Galliomycin and the stress manager genes **(C)** *C7 Contig 15362* and **(D)** *C8 Contig 19101*. The units on the Y axis were calculated based onthe 2-ΔΔCT method, and are expressed as mean. Each gene was normalized and compared to the expression of control (naive) insects using the *β-actin* reference gene. The Mann-Whitney test was used to compare the relative quantification of genes and a *p* ≤0.05 value was considered significant.
